# Supplementary material for: Anion channelrhodopsins for inhibitory cardiac optogenetics
Source: PubMed Central journal article supplement (PMC5024162; doi:10.1038/srep33530), 2016-09-15
Supplement: srep33530-s1.pdf [file srep33530-s1.pdf]

## **Supplementary Material**

### **Anion channelrhodopsins for inhibitory cardiac optogenetics**

Elena G. Govorunova<sup>1</sup>, Shane R. Cunha<sup>2</sup>, Oleg A. Sineshchekov<sup>1</sup> & John L. Spudich<sup>1\*</sup>

<sup>1</sup>Center for Membrane Biology, Department of Biochemistry & Molecular Biology, University of Texas Health Science Center at Houston – McGovern Medical School, Houston, Texas, USA;

<sup>2</sup>Department of Integrative Biology & Pharmacology, University of Texas Health Science Center at Houston – McGovern Medical School, Houston, Texas, USA.

\*Correspondence should be addressed to J.L.S. ([John.L.Spudich@uth.tmc.edu](mailto:John.L.Spudich@uth.tmc.edu)).

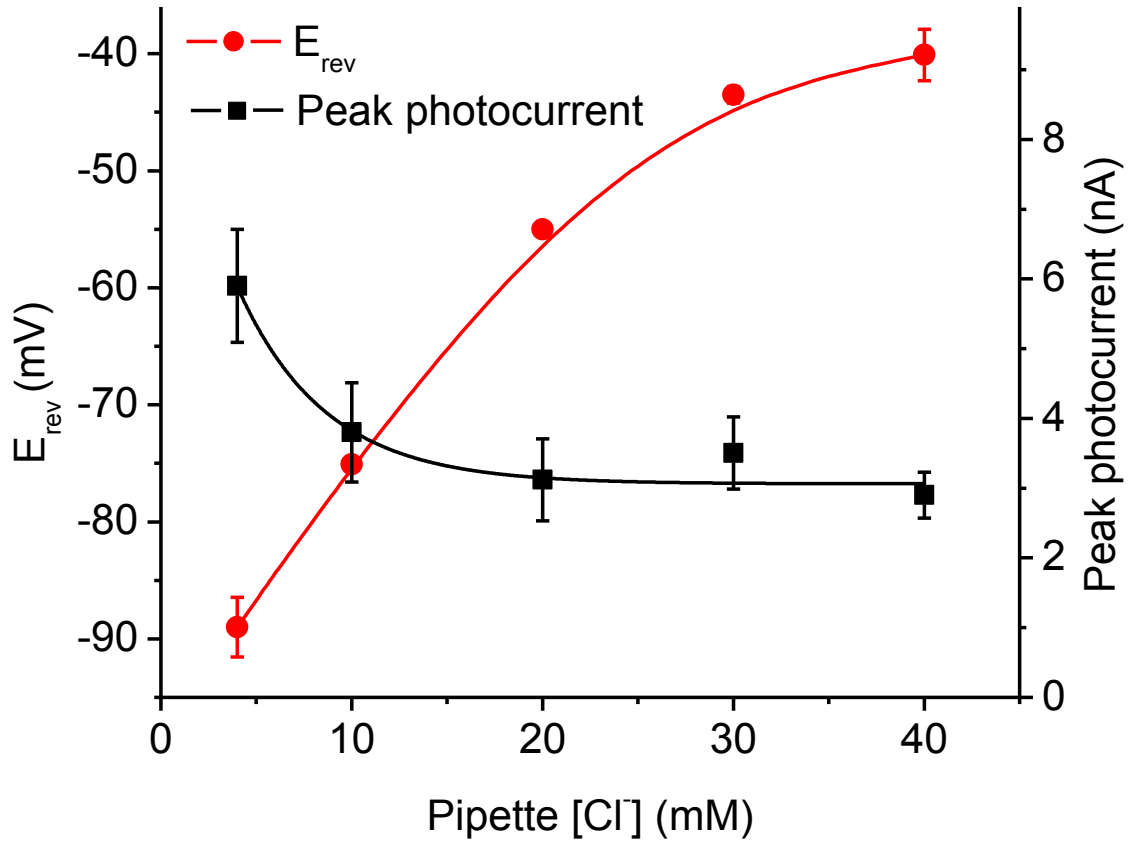

**Supplementary Figure S1.** The dependence of the reversal potential,  $E_{rev}$  (left axis) and the mean peak photocurrent at 0 mV (right axis) generated by *GtACR1* in NRVMs on the  $Cl^-$  concentration in the pipette. The data points are the mean values  $\pm$  sem ( $n = 3-4$  cells for  $E_{rev}$  and 6-8 cells for peak currents).

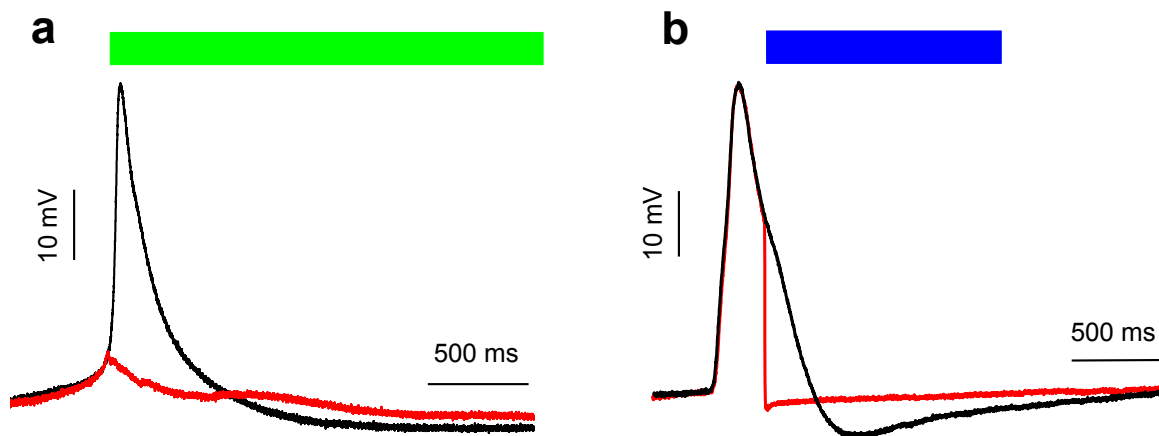

**Supplementary Figure S2. The influence of light on the AP shape in NRVMs expressing *GtACRs*.** (a) Inhibition of an AP by switching on the light during the depolarization phase in a *GtACR1*-expressing cell. Light (schematically shown as the green bar): 510 nm, 230  $\mu\text{W mm}^{-2}$ . (b) Shortening of the AP duration by switching on the light during the repolarization phase in a *GtACR2*-expressing cell. Light (schematically shown as the blue bar): 470 nm, 250  $\mu\text{W mm}^{-2}$ . In both panels the red lines show current traces recorded upon illumination, the black lines, traces recorded from the same cell in the dark.
